## RESEARCH ARTICLE

# Computed tomography characterization and outcome evaluation of COVID-19 pneumonia complicated by venous thromboembolism

Stefanie Meiler<sup>1\*</sup>, Okka Wilkea Hamer<sup>1,2</sup>, Jan Schaible<sup>1</sup>, Florian Zeman<sup>3</sup>, Niels Zorger<sup>4</sup>, Henning Kleine<sup>5</sup>, Janine Rennert<sup>1</sup>, Christian Stroszczyński<sup>1</sup>, Florian Poschenrieder<sup>1</sup>

**1** Department of Radiology, Regensburg University Medical Center, Regensburg, Germany, **2** Department of Radiology, Hospital Donaustauf, Donaustauf, Germany, **3** Center for Clinical Studies, Regensburg University Medical Center, Regensburg, Germany, **4** Department of Radiology, Hospital Barmherzige Brueder, Regensburg, Germany, **5** Department of Pneumology, Hospital Barmherzige Brueder, Regensburg, Germany

\* [stefanie.meiler@ukr.de](mailto:stefanie.meiler@ukr.de)

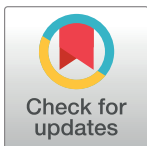

## OPEN ACCESS

**Citation:** Meiler S, Hamer OW, Schaible J, Zeman F, Zorger N, Kleine H, et al. (2020) Computed tomography characterization and outcome evaluation of COVID-19 pneumonia complicated by venous thromboembolism. *PLoS ONE* 15(11): e0242475. <https://doi.org/10.1371/journal.pone.0242475>

**Editor:** Ruud AW Veldhuizen, University of Western Ontario, CANADA

**Received:** July 22, 2020

**Accepted:** November 3, 2020

**Published:** November 19, 2020

**Copyright:** © 2020 Meiler et al. This is an open access article distributed under the terms of the [Creative Commons Attribution License](https://creativecommons.org/licenses/by/4.0/), which permits unrestricted use, distribution, and reproduction in any medium, provided the original author and source are credited.

**Data Availability Statement:** All relevant data are within the manuscript and its [Supporting Information](#) files.

**Funding:** The authors received no specific funding for this work.

**Competing interests:** No authors have competing interests.

## Abstract

### Background

COVID-19 is frequently complicated by venous thromboembolism (VTE). Computed tomography (CT) of the chest—primarily usually conducted as low-dose, non-contrast enhanced CT—plays an important role in the diagnosis and follow-up of COVID-19 pneumonia. Performed as contrast-enhanced CT pulmonary angiography, it can reliably detect or rule-out pulmonary embolism (PE). Several imaging characteristics of COVID-19 pneumonia have been described for chest CT, but no study evaluated CT findings in the context of VTE/PE.

### Purpose

In our retrospective study, we analyzed clinical, laboratory and CT imaging characteristics of 50 consecutive patients with RT-PCR proven COVID-19 pneumonia who underwent contrast-enhanced chest CT at two tertiary care medical centers.

### Material and methods

All patients with RT-PCR proven COVID-19 pneumonia and contrast-enhanced chest CT performed at two tertiary care hospitals between March 1st and April 20th 2020 were retrospectively identified. Patient characteristics (age, gender, comorbidities), symptoms, date of symptom onset, RT-PCR results, imaging results of CT and leg ultrasound, laboratory findings (C-reactive protein, differential blood count, troponine, N-terminal pro-B-type natriuretic peptide (NT-proBNP), fibrinogen, interleukin-6, D-dimer, lactate dehydrogenase (LDH), creatine kinase (CK), creatine kinase muscle-brain (CKmb) and lactate,) and patient outcome (positive: discharge or treatment on normal ward; negative: treatment on intensive care unit (ICU), need for mechanical ventilation, extracorporeal membrane oxygenation (ECMO), or death) were analyzed. Follow-up was performed until May 10th. Patients were assigned to two groups according to two endpoints: venous thromboembolism (VTE) or no VTE. For statistical analysis, univariate logistic regression models were calculated.

## Results

This study includes 50 patients. In 14 out of 50 patients (28%), pulmonary embolism was detected at contrast-enhanced chest CT. The majority of PE was detected on CTs performed on day 11–20 after symptom onset. Two patients (14%) with PE simultaneously had evidence of deep vein thrombosis. 15 patients (30%) had a negative outcome (need for intensive care, mechanical ventilation, extracorporeal membrane oxygenation, or death), and 35 patients (70%) had a positive outcome (transfer to regular ward, or discharge). Patients suffering VTE had a statistically significant higher risk of an unfavorable outcome ( $p = 0.028$ ). In univariate analysis, two imaging characteristics on chest CT were associated with VTE: crazy paving pattern ( $p = 0.024$ ) and air bronchogram ( $p = 0.021$ ). Also, elevated levels of NT-pro BNP ( $p = 0.043$ ), CK ( $p = 0.023$ ) and D-dimers ( $p = 0.035$ ) were significantly correlated with VTE.

## Conclusion

COVID-19 pneumonia is frequently complicated by pulmonary embolism (incidence of 28% in our cohort), remarkably with lacking evidence of deep vein thrombosis in nearly all thus affected patients of our cohort. As patients suffering VTE had an adverse outcome, we call for a high level of alertness for PE and advocate a lower threshold for contrast-enhanced CT in COVID-19 pneumonia. According to our observations, this might be particularly justified in the second week of disease and if a crazy paving pattern and / or air bronchogram is present on previous non-enhanced CT.

## Introduction

SARS-CoV-2-infection (Severe Acute Respiratory Syndrome Coronavirus 2) / COVID-19 (Coronavirus Disease 2019) is associated with a wide spectrum of clinical presentation, ranging from mild symptoms in the majority of cases [1–4] to severe and even fatal disease courses in approximately 10% of patients [5]. Severe courses of COVID-19 are often complicated by acute respiratory distress syndrome and multi-organ failure. Moreover, the patients are prone to thromboembolic complications with venous thromboembolism (VTE) being the commonest. The reported frequencies of pulmonary embolism (PE) detected by contrast-enhanced computed tomography (CT) range from 23 to 40% [6–10]. However, international guidelines recommend non-enhanced low dose CT for evaluation of COVID-19 pneumonia [11, 12]. Hence, thromboembolic complications might be missed and mandatory therapy withheld.

The aim of our retrospective study was to evaluate parenchymal characteristics in chest CT of COVID-19 pneumonia and laboratory parameters which are associated with pulmonary embolism or venous thrombosis. Furthermore, we analyzed the clinical outcome of patients with COVID-19 pneumonia with and without VTE.

## Material and methods

### Patient population

The study was approved by the institutional Ethics Committee of the University Medical Center Regensburg (IRB No. 20-1784-104). Written informed consent was waived. All procedures performed in studies involving human participants were in accordance with the ethical

standards of the institutional and / or national research committee and with the 1964 Helsinki declaration and its later amendments or comparable ethical standards.

The inclusion criteria were consecutive adult patients ( $\geq 18$  years old) with RT-PCR (real transcription polymerase chain reaction) positive for SARS-CoV-2 and a contrast-enhanced chest CT performed between March 1st and April 20th 2020. Exclusion criteria were a negative result of RT-PCR for SARS-CoV-2 and non-diagnostic CT for example due to motion-artifacts. Patients were identified by means of a full-text database query of all CT-scans performed between March 1st and April 20th 2020 using the term “\*COVID\*” OR \*SARS\* in the Radiological Information System (RIS, Nexus.medRIS, Version 8.42, Nexus, Villingen-Schwenningen, Germany). Patient characteristics (age, gender, comorbidities), symptoms, date of symptom onset, RT-PCR results, imaging results of leg ultrasound (if performed), laboratory findings (C-reactive protein, differential blood count, troponine, N-terminal pro-B-type natriuretic peptide(NT-proBNP), fibrinogen, interleukin-6, D-dimer, LDH, CK, CKmb and lactate) and patient outcome were extracted from electronic patient records. As for laboratory parameters the results determined closest to the date of the chest CT scan but not more than 3 days before or after were evaluated. All patients had at least one contrast-enhanced CT scan of the chest. Out of these CT scans, we included the first scan per patient. Abdominal CT, if performed, was included if scan date was not more than 3 days before or after the chest CT. Patients were followed until May 10th 2020.

### CT protocol

The patients underwent CT scans at two tertiary care hospitals and CTs were performed on two different scanners (16 slice Somatom Sensation 16, 128-slice Definition FLASH, Siemens Healthcare, Forchheim, Germany). All chest CT acquisitions were obtained in supine position during end-inspiration. The contrast media used was Accupaque 300 or 350 in a weight adapted dose for chest CT (but not more than 70) and 100 ml preset for abdomen CT intravenously administered at a flow rate of 4 ml/s (chest) or 3 ml/s (abdomen). Automatic tube voltage selection was applied with a reference tube voltage of 80–140 kV (CARE kV, Siemens Healthcare, Erlangen, Germany). Tube current was regulated by an automatic tube current modulation technique with the reference mAs setting being 130–150mAs (chest) or 210 mAs (abdomen). Collimation width was 0.625 mm–0.75 mm. Multiplanar reformations (MPR) were reconstructed in the transversal plane with a slice thickness of 0.75–1.5 mm (48 CTs) and 3 mm (2 CTs) in lung kernel and with a slice thickness of 0,75 mm (n = 3), 1 mm (n = 41), 3 mm (n = 3) and 5 mm (n = 3) in soft tissue kernel. Additional sagittal and coronal MPR were reconstructed with a slice thickness of 1–3 mm using lung and soft tissue kernel. The images were sent to a picture archiving and communication system (PACS, Syngo Imaging, Siemens Healthcare, Erlangen, Germany).

### Image analysis

Two junior radiologists with subspeciality training in thoracic radiology evaluated each half of the CT studies on a PACS workstation. The evaluated patterns had been part of the training of the radiologists. In equivocal cases a senior thoracic radiologist was consulted.

The radiologists were blinded to clinical data, laboratory data and patient status. The Fleischner Society definition of CT features were applied when appropriate. The following parameters were analysed:

- ground-glass-opacities (GGO): hazy increased opacity of lung, with preservation of bronchial and vascular margins.

- consolidation: homogeneous increase in pulmonary parenchymal attenuation that obscures the margins of vessels and airway walls
- crazy-paving pattern: thickened interlobular septa and intralobular lines superimposed on a background of ground-glass opacity.
- cavity: gas-filled space within consolidation
- bronchial dilatation: dilated (with respect to the accompanying pulmonary artery) non-tapering bronchus. The term „dilatation” instead of „-ectasis” was intentionally used in order to express that the pathology might be reversible.
- vessel dilatation: diameter of vessel within or near opacifications clearly larger compared to vessels of the same generation in healthy lung tissue.
- shape of opacification: round, curvilinear/band-like, geographic (= opacification outlines the shape of multiple adjacent pulmonary lobules, sharply marginated)
- margin of opacification: unsharp, at least to some extent sharp
- lung lobes affected
- distribution of opacifications in the axial plane: predominantly peripheral, predominantly central, predominantly anterior, predominantly posterior, diffuse
- lymphadenopathy: diameter > 10 mm in short axis.
- subjective estimation of extent of parenchymal opacification: 0–33%: mild, 34–66%: moderate, 67–100%: severe.
- pulmonary embolism (PE): contrast medium filling defects within the pulmonary arteries
- deep vein thrombosis (DVT) in CT: contrast medium filling defect in iliacal and / or femoral veins
- DVT in US: incomplete compressibility and absence of blood flow in iliacal veins and / or veins of the lower extremity

### Definition of outcome

Positive outcome was defined as either discharge or regular ward care, and negative outcome was defined to be need for intubation / mechanical ventilation and / or need for treatment on intensive care unit and / or need for extracorporeal membrane oxygenation (ECMO), or death.

### Statistical analysis

Age is presented as mean (standard deviation) while all laboratory variables and time to onset are presented as median (interquartile range) due to their skewed distribution. All categorical variables are presented as absolute and relative frequencies. Differences between patients with and without a venous thromboembolism (primary endpoint) were analyzed for all parameters (demographic data, clinical data, comorbidities and CT findings) by using the Mann-Whitney-U Test for all continuous variables and the Chi-square test of independence for all categorical variables. A multivariable model was not feasible due to the limited number of patients and events. A p-value <0.05 was considered statistically significant. All analyses were performed using R, version 3.6.1 (The R Foundation for Statistical Computing).

## Results

### Patient population and clinical symptoms

The study population consisted of 50 patients (male: 34(68%)) with a mean age of 60.4 years (10.1SD, range 37–88). A total of 59 contrast-enhanced CT scans were performed. The first CT performed per patient was included into the analysis. Thus, 50 CTs were evaluated, including 24 sole chest scans and 26 combined chest/abdomen scans. A total of 4 ultrasound examinations of the lower extremities were performed due to clinical suspicion for deep venous thrombosis. Two of these were patients with sole chest scans, the other 2 were patients with combined chest / abdomen scans.

Clinical symptoms were fever in 37 patients (74%), cough in 34 patients (68%), dyspnea in 34 patients (68%) and fatigue in 23 patients (46%). Less frequently were gastrointestinal complaints ( $n = 13$ ; 26%) and taste dysfunction ( $n = 8$ ; 16%). Most common comorbidities were high blood pressure ( $n = 20$ , 40%) and diabetes ( $n = 10$ , 20%). Prevalence of obesity and smoking history could not be determined because of under-report of corresponding data in patient charts.

15 patients (30%) had a positive outcome, and 35 patients (70%) had a negative outcome.

14 of 50 patients (28%) had evidence of PE as detected by chest CT (Fig 1). Two of these patients also had deep venous thrombosis confirmed in one case by abdominal CT and in the other by ultrasound. These patients were assigned to group 1. The remainder (36/50 patients, 72%) without VTE was assigned to group 2. No patient had venous thrombosis but no PE. The results are presented in Table 1.

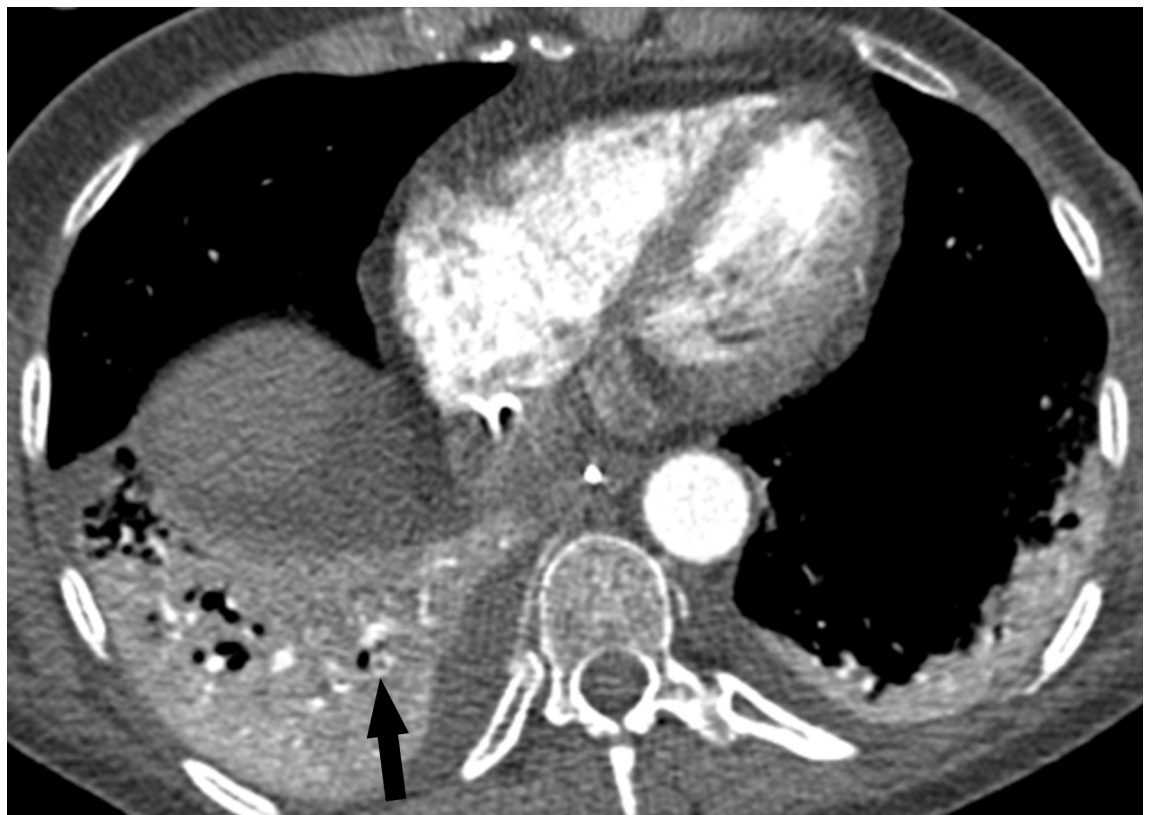

**Fig 1. Pulmonary embolism.** Axial reconstruction of a CT in soft tissue window showing pulmonary embolism of the right lower lobe.

<https://doi.org/10.1371/journal.pone.0242475.g001>

**Table 1. Patient characteristics (n = 50).**

| patient characteristics                              | patients (n = 50)   |
|------------------------------------------------------|---------------------|
| age (years)                                          | 60.4 (SD 10.1)      |
| <b>gender</b>                                        |                     |
| male                                                 | 34 (68%)            |
| female                                               | 16 (34%)            |
| <b>symptoms</b>                                      |                     |
| fever* (>37.5°C)                                     | 37 (74%)            |
| cough*                                               | 34 (68%)            |
| dyspnea*                                             | 34 (68%)            |
| fatigue*                                             | 23 (46%)            |
| taste dysfunction*                                   | 8 (16%)             |
| gastrointestinal*                                    | 13 (26%)            |
| <b>Comorbidities</b>                                 |                     |
| diabetes*                                            | 10 (20%)            |
| cardiac failure*                                     | 2 (4%)              |
| coronary heart disease*                              | 4 (8%)              |
| COPD*                                                | 2 (4%)              |
| asthma*                                              | 3 (6%)              |
| high blood pressure*                                 | 20 (40%)            |
| <b>outcome</b>                                       |                     |
| positive outcome                                     | 15 (30%)            |
| negative outcome                                     | 25 (70%)            |
| <b>incidence of VTE</b>                              |                     |
| VTE (group 1)                                        | 14 (28%)            |
| no VTE (group 2)                                     | 36 (72%)            |
| <b>time between symptom onset and CT scan (days)</b> | 15 (IQR 8.5–24.5)** |
| 0–10                                                 | 13 (33%)            |
| 11–20                                                | 13 (33%)            |
| 21–30                                                | 7 (18%)             |
| > 30                                                 | 6 (15%)             |

\* occasional missing values

\*\* for 11 patients symptom onset was not documented

COPD = chronic obstructive pulmonary disease, VTE = venous thromboembolism

<https://doi.org/10.1371/journal.pone.0242475.t001>

## CT morphology

Ground glass opacities (96%, n = 48) and consolidation (86%, n = 43) were the most commonly observed patterns on chest CT. A crazy paving pattern was identified in 46% of the scans (n = 23). Bronchial dilatation was seen in 20% (n = 10), air bronchogram in 60% (n = 30) and vessel enlargement in 56% (n = 28) of CTs. Pleural effusion was observed in 30% (n = 15) and lymphadenopathy in 58% (n = 29) of CTs.

Most of the lesions were to at least some extent sharply margined (74%, n = 37). In 36% of CTs (n = 18), opacifications were curvilinear shaped or round, and geographic in 24% (n = 12). The vast majority of CTs showed pulmonary lesions bilaterally (94%, n = 47), and pulmonary lobes were affected equally frequent with slight preponderance of lesions in the right lower lobe, left lower lobe and left upper lobe (n = 47, 94% each) as compared to the remaining lobes (n = 45, 90%). Distribution in the axial plane was predominantly posterior

Table 2. CT characterization of pulmonary pathology.

| CT findings                        | patients n = 50 |
|------------------------------------|-----------------|
| <b>CT signs</b>                    |                 |
| consolidation                      | 43 (86%)        |
| GGO                                | 48 (96%)        |
| crazy paving                       | 23 (46%)        |
| round shape of opacification       | 18 (36%)        |
| sharp margin of opacification      | 37 (74%)        |
| geographic shape of opacification  | 12 (24%)        |
| curvilinear/bandlike opacification | 18 (36%)        |
| bronchial dilatation               | 20 (10%)        |
| air bronchogram                    | 60 (30%)        |
| cavitation                         | 0 (0%)          |
| peripheral vessel enlargement      | 28 (56%)        |
| pleural effusion                   | 15 (30%)        |
| lymphadenopathy                    | 29 (58%)        |
| <b>distribution</b>                |                 |
| bilateral                          | 47 (94%)        |
| unilateral                         | 1 (2%)          |
| right upper lobe                   | 45 (90%)        |
| right middle lobe                  | 45 (90%)        |
| right lower lobe                   | 47 (94%)        |
| left upper lobe                    | 47 (94%)        |
| left lower lobe                    | 47 (94%)        |
| predominantly anterior             | 0 (0%)          |
| predominantly posterior            | 39 (78%)        |
| predominantly peripheral           | 26 (52%)        |
| diffuse                            | 24 (48%)        |
| <b>extent of lung involvement</b>  |                 |
| mild                               | 8 (12%)         |
| moderate                           | 6 (12%)         |
| severe                             | 34 (71%)        |

CT = computed tomography, GGO = ground-glass opacities

<https://doi.org/10.1371/journal.pone.0242475.t002>

(78%, n = 39). Lesions were predominantly peripherally located in 26 patients (52%) and diffusely distributed in 24 patients (48%). A mild extent of opacifications was seen in 17% (n = 8) of CTs, moderate extent in 12% (n = 6), and severe extent in 71% (n = 34). Results are presented in Table 2.

### Laboratory parameters

Laboratory analysis revealed an elevated C-reactive protein (CRP) with a median of 127 mg/l (IQR 57.17–235.75), lactate dehydrogenase (LDH) with a median of 392 U/l (IQR 299.5–477.75), interleukin 6 with a median of 149.8 pg/ml (IQR 58.6–511.5), but also troponin (median 30.2 (IQR 14.02–65.58)) and N-terminal pro-B-type natriuretic peptide (NT-proBNP) (median 873.5 (IQR 455.25–2748.75)). Fibrinogen had a median of 581.3 mg/dl (IQR 495.8–660.4), D-dimers a median of 2.92 mg/l (IQR 1.3–6.88). These parameters are presented in Table 3.



**Table 3. Laboratory parameters.**

| parameter             | n  | median                     | normal range |
|-----------------------|----|----------------------------|--------------|
| CRP (mg/l)            | 48 | 127 (IQR 57.17–235.75)     | < 5          |
| leukocytes (/nl)      | 48 | 9.63 (IQR 6.77–13.9)       | 4.23–9.1     |
| lymphocytes rel (%)   | 42 | 12.35 (IQR 7.77–21.1)      | 21.5–53.1    |
| lymphocytes abs       | 38 | 1.08 (IQR 0.8–1.53)        | 1.32–3.57    |
| eosinophiles rel (%)  | 40 | 0.35 (IQR 0–1.1)           | 0.8–7        |
| eosinophiles abs      | 38 | 0.04 (IQR 0–0.12)          | 0.04–0.54    |
| troponine (ng/l)      | 34 | 30.2 (IQR 14.02–65.58)     | < = 14       |
| NT-proBNP (pg/ml)     | 18 | 873.5 (IQR 455.25–2748.75) | <486         |
| fibrinogen (mg/dl)    | 32 | 581.3 (IQR 495.8–660.4)    | 210–400      |
| interleukin 6 (pg/ml) | 32 | 149.8 (IQR 58.6–511.5)     | <7           |
| D-dimer (mg/l)        | 38 | 2.92 (IQR 1.3–6.88)        | <0.5         |
| LDH (U/l)             | 44 | 392 (IQR 299.5–477.75)     | <250         |
| CK (U/l)              | 44 | 172 (IQR 57.5–373.25)      | <190         |
| CKmb (ng/ml)          | 26 | 2.85 (IQR 1.72–9.57)       | 0.5–3.6      |
| lactate (mg/dl)       | 39 | 11 (IQR 9–14.5)            | <16          |

CRP = C reactive protein, NT-proBNP = N-terminal pro-B-type natriuretic peptide, LDH = lactate dehydrogenase, CK = creatin-kinase, CKmb = creatin-kinase muscle-brain

<https://doi.org/10.1371/journal.pone.0242475.t003>

## Univariate analysis for identification of parameters with impact on patient's outcome

**Demographic data, clinical data and comorbidities.** Symptoms of taste dysfunction at first admission were exclusively present in patients without evidence of VTE, resulting in a statistically significant difference in the frequency of this clinical symptom between the two groups with / without VTE ( $p = 0.02$ , Table 4). No other demographic or clinical parameters and comorbidities influenced the event of VTE. Gender distribution in both groups was comparable ( $p = 0.70$ ).

Patients with VTE were statistically significant more likely to experience a negative clinical outcome than patients without evidence of VTE (Table 4). Moreover, scans performed 11–20 days after symptom onset revealed a significant higher number of VTE than those scans were performed 0–10 days after symptom onset ( $p = 0.027$ ).

**CT findings.** Crazy paving pattern ( $p = 0.024$ ) (Fig 2) and air bronchogram ( $p = 0.021$ ) (Fig 3) were correlated with incidence of VTE. Apart from these two findings, no other CT findings were associated with VTE (Table 5).

**Laboratory parameters.** NT-pro BNP ( $p = 0.043$ ), CK ( $p = 0.023$ ) and D-dimers ( $p = 0.035$ ) were correlated with VTE. There was also a tendency towards an elevated lymphocyte count in the group of VTE, which, however, did not reach statistical significance ( $p = 0.057$ ) (Table 6).

## Discussion

As the lung is the main target organ of SARS-CoV-2, chest CT plays a major role in the care of patients with COVID-19. According to international guidelines for imaging in COVID-19, the standard care is low-dose chest CT without administration of contrast agent [11, 12]. Thus, pulmonary embolism might be undetected at CT. Meanwhile we had to learn that COVID-19 is more frequently complicated by VTE than other pneumonias [7–10, 13, 14]. Several studies assessed the predictive significance of CT in COVID-19 with regard to patient outcome in



**Table 4. Differences between VTE vs. no VTE in demographic data, clinical data, comorbidities and outcome.**

| parameter                                            | VTE group (n = 14)      | no VTE group (n = 36) | p-value        |
|------------------------------------------------------|-------------------------|-----------------------|----------------|
| age                                                  | 60.5(SD 9.7)            | 76.1(SD 94.5)         | 0.543          |
| gender                                               |                         |                       |                |
| male                                                 | 10 (30%)                | 23 (70%)              |                |
| female                                               | 4 (25%)                 | 12 (75%)              | 0.700          |
| symptoms                                             |                         |                       |                |
| fever*                                               |                         |                       |                |
| No                                                   | 4 (50%)                 | 4 (50%)               |                |
| Yes                                                  | 8 (22%)                 | 29 (78%)              | 0.100          |
| cough*                                               |                         |                       |                |
| no                                                   | 2 (20%)                 | 8 (80%)               |                |
| yes                                                  | 9 (26%)                 | 25 (74%)              | 0.678          |
| dyspnoea*                                            |                         |                       |                |
| no                                                   | 4 (40%)                 | 6 (60%)               |                |
| yes                                                  | 10 (29%)                | 24 (71%)              | 0.527          |
| fatigue*                                             |                         |                       |                |
| no                                                   | 6 (46%)                 | 7 (54%)               |                |
| yes                                                  | 6 (26%)                 | 17 (74%)              | 0.220          |
| gastrointestinal*                                    |                         |                       |                |
| no                                                   | 10 (45%)                | 12 (55%)              |                |
| yes                                                  | 2 (15%)                 | 11 (85%)              | 0.070          |
| taste dysfunction*                                   |                         |                       |                |
| no                                                   | 12 (44%)                | 15 (56%)              |                |
| yes                                                  | 0 (0%)                  | 8 (100%)              | <b>0.020</b>   |
| comorbidities                                        |                         |                       |                |
| diabetes*                                            |                         |                       |                |
| no                                                   | 10 (25%)                | 30 (75%)              |                |
| yes                                                  | 4 (40%)                 | 6 (60%)               | 0.345          |
| cardiac failure*                                     |                         |                       |                |
| no                                                   | 14 (29%)                | 34 (71%)              |                |
| yes                                                  | 0 (0%)                  | 2 (100%)              | 0.368          |
| coronary heart disease*                              |                         |                       |                |
| no                                                   | 14 (30%)                | 32 (70%)              |                |
| yes                                                  | 0 (0%)                  | 4 (100%)              | 0.193          |
| COPD*                                                |                         |                       |                |
| no                                                   | 14 (29%)                | 34 (71%)              |                |
| yes                                                  | 0 (0%)                  | 2 (100%)              | 0.368          |
| asthma*                                              |                         |                       |                |
| no                                                   | 14 (30%)                | 33 (70%)              |                |
| yes                                                  | 0 (0%)                  | 3 (100%)              | 0.265          |
| high blood pressure*                                 |                         |                       |                |
| no                                                   | 9 (30%)                 | 21 (70%)              |                |
| yes                                                  | 5 (25%)                 | 15 (75%)              | 0.700          |
| outcome                                              |                         |                       |                |
| negative                                             | 13 (92.9%)              | 22 (61.1%)            |                |
| positive                                             | 1 (7.1%)                | 14 (38.9%)            | <b>0.028</b>   |
| <b>time between symptom onset and CT scan (days)</b> | <b>16 (IQR 13.5–20)</b> | <b>15 (IQR 7–25)</b>  | <b>0.326**</b> |
| 0–10                                                 | 1 (8%)                  | 12 (92%)              | reference      |

*(Continued)*

**Table 4.** (Continued)

| parameter | VTE group (n = 14) | no VTE group (n = 36) | p-value      |
|-----------|--------------------|-----------------------|--------------|
| 11–20     | 6 (46%)            | 7 (54%)               | <b>0.027</b> |
| 21–30     | 2 (29%)            | 5 (71%)               | 0.212        |
| > 30      | 1 (17%)            | 5 (83%)               | 0.554        |

COPD = chronic obstructive pulmonary disease, SD = standard deviation, VTE = venous thromboembolism

Positive outcome: treatment on regular ward, or discharge

Negative outcome: treatment on ICU, mechanical ventilation, ECMO, or death

\* occasional missing values

\*\* for 11 patients symptom onset was not documented

<https://doi.org/10.1371/journal.pone.0242475.t004>

general [15–20], but none particularly examined CT characteristics of COVID-19 pneumonia in the light of VTE.

In our cohort of 50 patients with RT-PCR proven COVID-19 the percentage of patients with VTE detected by CT was 28% and thus is in the range of previously reported data [6–10, 13, 21]. Of note, the chest CTs performed on day 11–20 after symptom onset revealed a significant higher number of PE (46%) compared to CTs done on day 0–10. This suggests that patients in this stage of disease might bear a higher risk for VTE as compared to patients examined earlier or later in the disease course. Obviously the development of hypercoagulability takes some time as is supported by literature data showing rising D-Dimer levels during the course of disease [22].

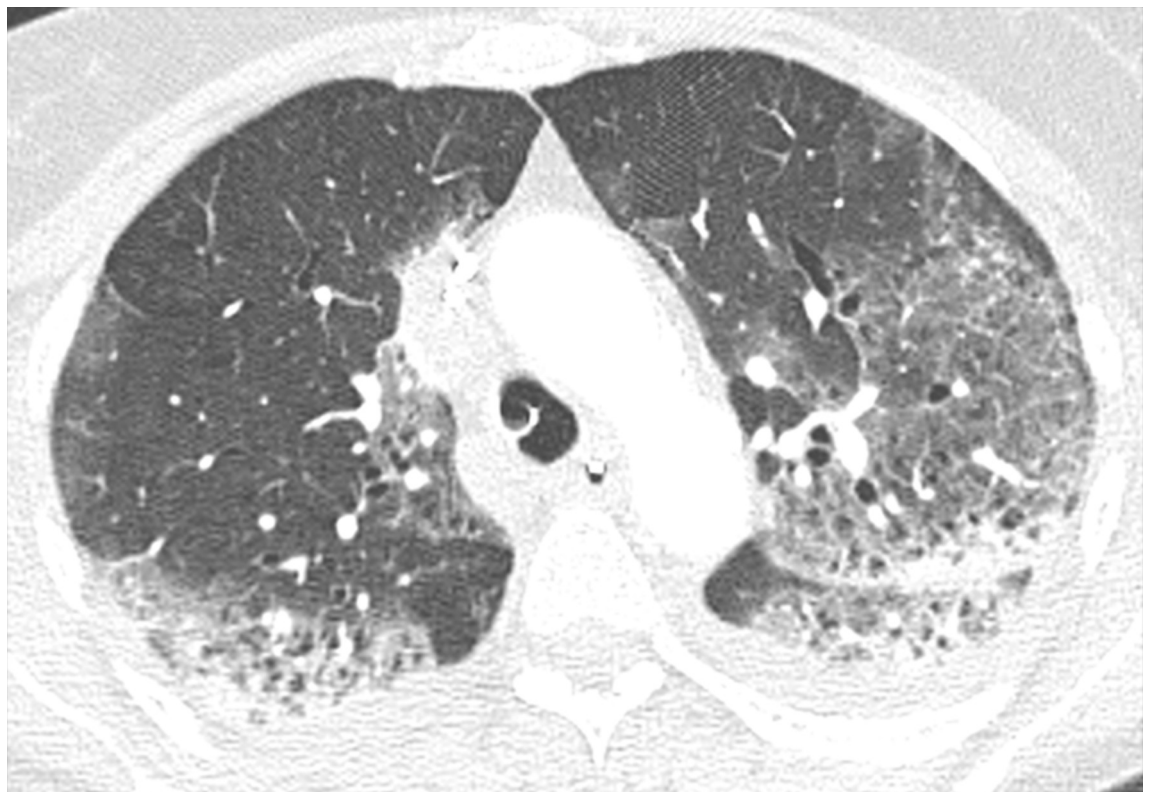

**Fig 2. Crazy paving.** Axial reconstruction of a CT in lung window demonstrating crazy paving.

<https://doi.org/10.1371/journal.pone.0242475.g002>

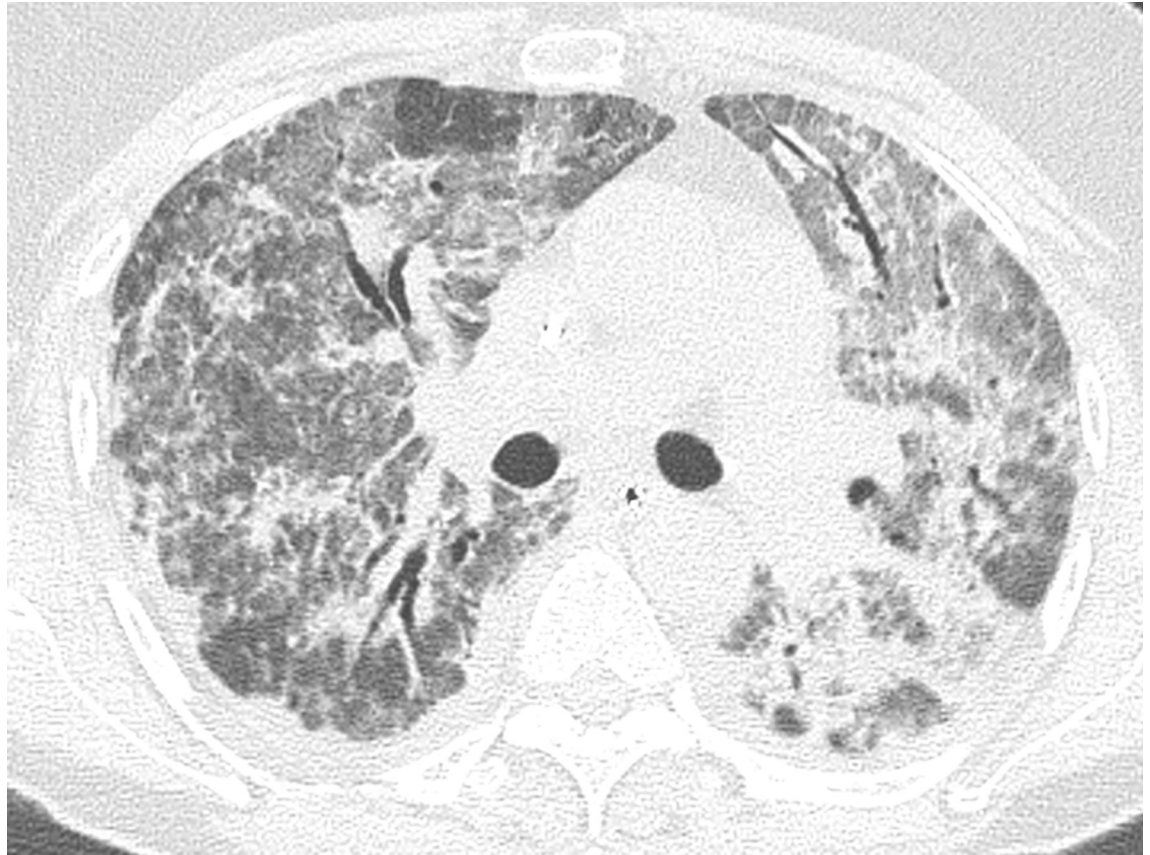

**Fig 3. Air bronchogram.** Axial reconstructions of a CT in lung window showing air bronchogram.

<https://doi.org/10.1371/journal.pone.0242475.g003>

Remarkably, only 2 out of 14 patients (14.3%) affected by PE had evidence of DVT, and only 4 out of the 14 patients (28.6%) with PE were examined for DVT based on clinical suspicion. This suggests that most of VTE events were unexpected PE and not accompanied by clinical signs of DVT. Our finding is in accordance with another publication [23] and supports the hypothesis of local (“in situ”) thrombus formation being a characteristic of COVID-19 associated disturbance of the coagulatory system rather than classical venous thromboembolism due to remote thrombogenesis [24].

Comparing comorbidities and clinical symptoms assessed at initial presentation of patients without and with VTE, we could not identify any clinically relevant significant differences. Thus, there seem to be no anamnestic or clinical findings which could serve as a red flag indicating an increased risk for VTE in COVID-19.

Laboratory parameters indicating inflammation (C-reactive protein, interleukin-6 and leucocyte count) were similarly elevated in the VTE and non-VTE group, thus the extent of inflammatory activity does not seem to correlate with the risk for VTE. Expectably, D-dimer values of patients with VTE were significantly higher than those of patients without evidence of VTE ( $p = 0.035$ ), and NTproBNP and CK values were significantly elevated in the VTE group ( $p = 0.043$  and  $0.023$ , respectively), indicating right heart strain.

In our study, crazy paving pattern and air bronchogram on chest CT were significantly more frequent in patients with VTE than in patients without evidence for VTE ( $p = 0.024$  and  $0.021$ , respectively). 92% of patients with VTE had a severe extent of pulmonary involvement as compared to 63% of patients without evidence of VTE. Although the difference was not

Table 5. Differences between VTE vs. no VTE regarding CT features.

| CT findings                        | VTE group (n = 14) | no VTE group (n = 36) | p-value      |
|------------------------------------|--------------------|-----------------------|--------------|
| GGO                                |                    |                       |              |
| no                                 | 1 (50%)            | 1 (50%)               |              |
| yes                                | 13 (27%)           | 35 (73%)              | 0.479        |
| consolidation                      |                    |                       |              |
| no                                 | 1 (14%)            | 6 (86%)               |              |
| yes                                | 13 (30%)           | 30 (70%)              | 0.384        |
| crazy paving                       |                    |                       |              |
| no                                 | 4 (15%)            | 23 (85%)              |              |
| yes                                | 10 (43%)           | 13 (57%)              | <b>0.024</b> |
| round shape of opacification       |                    |                       |              |
| no                                 | 7 (22%)            | 25 (78%)              |              |
| yes                                | 7 (39%)            | 11 (61%)              | 0.198        |
| sharp margin of opacification      |                    |                       |              |
| no                                 | 1 (8%)             | 12 (92%)              |              |
| yes                                | 13 (35%)           | 24 (65%)              | 0.058        |
| geographic shape of opacification  |                    |                       |              |
| no                                 | 9 (24%)            | 29 (76%)              |              |
| yes                                | 5 (42%)            | 7 (58%)               | 0.226        |
| curvilinear/bandlike opacification |                    |                       |              |
| no                                 | 10 (31%)           | 22 (69%)              |              |
| yes                                | 4 (22%)            | 14 (78%)              | 0.495        |
| bronchial dilatation               |                    |                       |              |
| no                                 | 10 (29%)           | 25 (71%)              |              |
| yes                                | 4 (27%)            | 11 (73%)              | 0.891        |
| air bronchogram                    |                    |                       |              |
| no                                 | 2 (10%)            | 18 (90%)              |              |
| yes                                | 12 (40%)           | 18 (60%)              | <b>0.021</b> |
| cavitation                         |                    |                       |              |
| no                                 | 0 (100%)           | 0 (100%)              | —            |
| vessel enlargement                 |                    |                       |              |
| no                                 | 4 (18%)            | 18 (82%)              |              |
| yes                                | 10 (36%)           | 18 (64%)              | 0.171        |
| pleural effusion                   |                    |                       |              |
| no                                 | 9 (26%)            | 26 (74%)              |              |
| yes                                | 5 (33%)            | 10 (67%)              | 0.582        |
| lymphadenopathy                    |                    |                       |              |
| no                                 | 8 (38%)            | 13 (62%)              |              |
| yes                                | 6 (21%)            | 23 (79%)              | 0.176        |
| unilateral                         |                    |                       |              |
| no                                 | 14 (29%)           | 35 (71%)              |              |
| yes                                | 0 (0%)             | 1 (100%)              | 0.529        |
| bilateral                          |                    |                       |              |
| no                                 | 1 (33%)            | 2 (67%)               |              |
| yes                                | 13 (28%)           | 34 (72%)              | 0.832        |
| right upper lobe                   |                    |                       |              |
| no                                 | 1 (20%)            | 4 (80%)               |              |
| yes                                | 13 (29%)           | 32 (71%)              | 0.675        |

(Continued)

Table 5. (Continued)

| CT findings                | VTE group (n = 14) | no VTE group (n = 36) | p-value   |
|----------------------------|--------------------|-----------------------|-----------|
| right middle lobe          |                    |                       |           |
| no                         | 1 (20%)            | 4 (80%)               |           |
| yes                        | 13 (29%)           | 32 (71%)              | 0.675     |
| right lower lobe           |                    |                       |           |
| no                         | 1 (33%)            | 2 (67%)               |           |
| yes                        | 13 (28%)           | 34 (72%)              | 0.832     |
| left upper lobe            |                    |                       |           |
| no                         | 1 (33%)            | 2 (67%)               |           |
| yes                        | 13 (28%)           | 34 (72%)              | 0.832     |
| left lower lobe            |                    |                       |           |
| no                         | 1 (33%)            | 2 (67%)               |           |
| yes                        | 13 (28%)           | 34 (72%)              | 0.832     |
| peripheral                 |                    |                       |           |
| no                         | 8 (33%)            | 16 (67%)              |           |
| yes                        | 6 (23%)            | 20 (77%)              | 0.420     |
| central                    |                    |                       |           |
| no                         | 14 (28%)           | 36 (72%)              | —         |
| diffuse                    |                    |                       |           |
| no                         | 7 (27%)            | 19 (73%)              |           |
| yes                        | 7 (29%)            | 17 (71%)              | 0.860     |
| predominantly anterior     |                    |                       |           |
| no                         | 14 (28%)           | 36 (72%)              | —         |
| predominantly posterior    |                    |                       |           |
| no                         | 2 (18%)            | 9 (82%)               |           |
| yes                        | 12 (31%)           | 27 (69%)              | 0.412     |
| extent of lung involvement |                    |                       |           |
| mild                       | 1 (12%)            | 7 (88%)               | reference |
| moderate                   | 0 (0%)             | 6 (100%)              | 0.369     |
| severe                     | 12 (35%)           | 22 (65%)              | 0.210     |

CT = computed tomography, GGO = ground-glass opacities

<https://doi.org/10.1371/journal.pone.0242475.t005>

statistically significant, CT in patients with VTE in most cases reflected a more advanced stage of pulmonary involvement in COVID-19. We think that this finding might explain the higher incidence of a crazy paving pattern in CT of patients with VTE, as crazy paving usually is visible in more severe and advanced lung disease [25–27]. This might also apply to the higher prevalence of air bronchogram in CT of patients with VTE. Except these two findings we could not identify any other imaging characteristics that appeared more frequently in the context of VTE other than the direct proof of filling defects in the pulmonary vasculature. Remarkably, there was no preponderance of peripheral or posterior lung involvement (which are hallmarks of pulmonary infarction) in the VTE group as compared to the non-VTE group. As the incidence of vessel enlargement did not differ in both groups (VTE vs. non-VTE), we do not assume that this phenomenon is related to PE. Regarding our CT findings of COVID-19 pneumonia complicated by VTE, both crazy paving pattern and / or air bronchogram on a non-contrast-enhanced chest CT could give a hint on occult PE.

In our study, the vast majority (93%) of patients with VTE had a negative clinical outcome (i.e. need for treatment on ICU, mechanical ventilation, ECMO, or death), whereas without

**Table 6. Differences between VTE vs. no VTE regarding laboratory parameters.**

| parameter             | VTE group (n = 14)        | no VTE group (n = 36)   | p-value      |
|-----------------------|---------------------------|-------------------------|--------------|
| CRP (mg/L)            | 152 (IQR 73.38–264.25)    | 112 (IQR 50.6–228.25)   | 0.292        |
| leukocytes (/nl)      | 11.18 (IQR 8.34–17.88)    | 8.44 (IQR 5.82–12.71)   | 0.057        |
| lymphocytes rel (%)   | 8.8 (IQR 5.9–16)          | 13 (IQR 8.3–21.4)       | 0.259        |
| lymphocytes abs       | 1.08 (IQR 0.76–1.47)      | 1.09 (IQR 0.81–1.53)    | 0.987        |
| eosinophiles rel (%)  | 0.2 (IQR 0–0.8)           | 0.4 (IQR 0–1.55)        | 0.506        |
| eosinophiles abs      | 0.04 (IQR 0.01–0.09)      | 0.06 (IQR 0–0.19)       | 0.737        |
| troponine (ng/l)      | 68.4 (IQR 18.2–115)       | 18.1 (IQR 13.6–38.6)    | 0.132        |
| NT-proBNP (pg/ml)     | 2103 (IQR 1682–5293)      | 508 (IQR 387–923)       | <b>0.043</b> |
| fibrinogen (mg/dl)    | 532.7 (IQR 397.25–631.45) | 602 (IQR 536.3–688.3)   | 0.171        |
| interleukin 6 (pg/ml) | 122.7 (IQR 60.1–558.1)    | 157.9 (IQR 49.85–439.2) | 0.803        |
| D-dimer (mg/L)        | 8.75 (IQR 2.49–13.39)     | 2.35 (IQR 1.16–4.24)    | <b>0.035</b> |
| LDH (U/l)             | 415.5 (IQR 293.5–540.5)   | 392 (IQR 306–458)       | 0.554        |
| CK (U/l)              | 392.5 (IQR 168.5–1136)    | 97 (IQR 54.5–255.75)    | <b>0.023</b> |
| Ckmb (ng/ml)          | 3.1 (IQR 1.88–9.8)        | 2.75 (IQR 1.75–6.53)    | 0.812        |
| lactate (mg/dl)       | 10 (IQR 9–15)             | 12 (IQR 9–13.75)        | 0.834        |

CRP = C-reactive protein, NT-proBNP = N-terminal pro-B-type natriuretic peptide, LDH = lactate dehydrogenase, CK = creatin-kinase, CKmb = creatin-kinase muscle brain

<https://doi.org/10.1371/journal.pone.0242475.t006>

evidence of VTE, 61% of patients had a negative outcome. This difference was statistically significant ( $p = 0.028$ ).

Our study has limitations. CT scans were performed at the discretion of the referring physician. Because we focused on pulmonary embolism, we only could include patients who underwent contrast-enhanced CT. Hence, a bias towards seriously ill patients has to be assumed, since contrast-medium application usually is reserved for this group of patients with COVID-19. The recruiting hospitals were tertiary care centers with one of them being the regional main center for critically ill patients. Thus, the proportion of patients with severely affected lung parenchyma was comparatively high. Further research is mandatory to evaluate long term prognosis and possible residua after restitution.

## Conclusion

Patients with COVID-19 pneumonia who underwent contrast-enhanced CT had signs of PE in a substantial percentage (28%) and, remarkably, did not have evidence of concomitant DVT in the vast majority of thus affected patients. As we found the incidence of PE to be significantly higher when CT was performed on day 11–20 after symptom onset, we call for a high level of suspicion for VTE particularly in this time period and advocate a lower threshold for contrast-agent administration at chest CT in COVID-19 pneumonia. According to our observations this might especially be justified for follow-up examinations if previous non-enhanced CT shows a crazy-paving pattern and / or air bronchogram, as these two imaging characteristics were significantly associated with PE in our study.

## Supporting information

**S1 File.**  
(XLSX)



## Author Contributions

**Conceptualization:** Okka Wilkea Hamer, Florian Poschenrieder.

**Data curation:** Stefanie Meiler, Jan Schaible, Florian Zeman, Henning Kleine, Florian Poschenrieder.

**Formal analysis:** Stefanie Meiler, Jan Schaible, Florian Zeman.

**Investigation:** Stefanie Meiler, Okka Wilkea Hamer, Henning Kleine, Florian Poschenrieder.

**Methodology:** Okka Wilkea Hamer, Florian Zeman, Florian Poschenrieder.

**Project administration:** Stefanie Meiler, Jan Schaible, Florian Poschenrieder.

**Resources:** Niels Zorger, Janine Rennert, Christian Stroszczyński.

**Software:** Florian Zeman.

**Supervision:** Okka Wilkea Hamer, Florian Zeman, Florian Poschenrieder.

**Validation:** Stefanie Meiler, Okka Wilkea Hamer, Florian Zeman, Florian Poschenrieder.

**Visualization:** Stefanie Meiler, Okka Wilkea Hamer, Florian Poschenrieder.

**Writing – original draft:** Stefanie Meiler, Okka Wilkea Hamer, Florian Zeman, Florian Poschenrieder.

**Writing – review & editing:** Okka Wilkea Hamer, Florian Zeman, Florian Poschenrieder.

## References

1. Wu Z, McGoogan JM. Characteristics of and Important Lessons From the Coronavirus Disease 2019 (COVID-19) Outbreak in China: Summary of a Report of 72 314 Cases From the Chinese Center for Disease Control and Prevention. *JAMA* 2020. <https://doi.org/10.1001/jama.2020.2648> PMID: 32091533
2. Weiss P, Murdoch DR. Clinical course and mortality risk of severe COVID-19. *The Lancet*. 2020; 395:1014–5. [https://doi.org/10.1016/S0140-6736\(20\)30633-4](https://doi.org/10.1016/S0140-6736(20)30633-4) PMID: 32197108
3. Fauci AS, Lane HC, Redfield RR. Covid-19—Navigating the Uncharted. *N Engl J Med*. 2020; 382:1268–9. <https://doi.org/10.1056/NEJMe2002387> PMID: 32109011
4. Guan W-J, Ni Z-Y, Hu Y, Liang W-H, Ou C-Q, He J-X, et al. Clinical Characteristics of Coronavirus Disease 2019 in China. *N Engl J Med*. 2020; 382:1708–20. <https://doi.org/10.1056/NEJMoa2002032> PMID: 32109013
5. Wu C, Chen X, Cai Y, Xia J'a, Zhou X, Xu S, et al. Risk Factors Associated With Acute Respiratory Distress Syndrome and Death in Patients With Coronavirus Disease 2019 Pneumonia in Wuhan, China. *JAMA Intern Med* 2020. <https://doi.org/10.1001/jamainternmed.2020.0994> PMID: 32167524
6. Grillet F, Behr J, Calame P, Aubry S, Delabrousse E. Acute Pulmonary Embolism Associated with COVID-19 Pneumonia Detected by Pulmonary CT Angiography. *Radiology*. 2020:201544. <https://doi.org/10.1148/radiol.2020201544> PMID: 32324103
7. Leonard-Lorant I, Delabranche X, Severac F, Helms J, Pautet C, Collange O, et al. Acute Pulmonary Embolism in COVID-19 Patients on CT Angiography and Relationship to D-Dimer Levels. *Radiology*. 2020:201561. <https://doi.org/10.1148/radiol.2020201561> PMID: 32324102
8. Lodigiani C, Iapichino G, Carenzo L, Cecconi M, Ferrazzi P, Sebastian T, et al. Venous and arterial thromboembolic complications in COVID-19 patients admitted to an academic hospital in Milan, Italy. *Thromb Res*. 2020; 191:9–14. <https://doi.org/10.1016/j.thromres.2020.04.024> PMID: 32353746
9. 53. Chen\_Lancet Inf Dis acute-plummonary-embolism-in-covid-19-patients.
10. Klok FA, Kruip MJHA, van der Meer NJM, Arbous MS, Gommers DAMPJ, Kant KM, et al. Incidence of thrombotic complications in critically ill ICU patients with COVID-19. *Thromb Res* 2020. <https://doi.org/10.1016/j.thromres.2020.04.013> PMID: 32291094
11. Rubin GD, Ryerson CJ, Haramati LB, Sverzellati N, Kanne JP, Raouf S, et al. The Role of Chest Imaging in Patient Management during the COVID-19 Pandemic: A Multinational Consensus Statement



- from the Fleischner Society. *Radiology*. 2020;201365. <https://doi.org/10.1148/radiol.2020201365> PMID: 32255413
12. Vogel-Claussen J, Ley-Zaporozhan J, Agarwal P, Biederer J, Kauczor H-U, Ley S, et al. Empfehlungen der AG Thoraxdiagnostik der Deutschen Röntgengesellschaft zur klinischen Anwendung der Thoraxbildgebung und strukturierten CT-Befundung bei COVID-19-Pandemie. *Rofo* 2020. <https://doi.org/10.1055/a-1174-8378> PMID: 32455442
  13. Middeldorp S, Coppens M, van Haaps TF, Foppen M, Vlaar AP, Müller MCA, et al. Incidence of venous thromboembolism in hospitalized patients with COVID-19. *J Thromb Haemost* 2020. <https://doi.org/10.1111/JTH.14888> PMID: 32369666
  14. Litjens J-F, Leclerc M, Chochois C, Monsallier J-M, Ramakers M, Auvray M, et al. High incidence of venous thromboembolic events in anticoagulated severe COVID-19 patients. *J Thromb Haemost* 2020. <https://doi.org/10.1111/jth.14869> PMID: 32320517
  15. Colombi D, Bodini FC, Petrini M, Maffi G, Morelli N, Milanese G, et al. Well-aerated Lung on Admitting Chest CT to Predict Adverse Outcome in COVID-19 Pneumonia. *Radiology*. 2020;201433. <https://doi.org/10.1148/radiol.2020201433> PMID: 32301647
  16. Yu Q, Wang Y, Huang S, Liu S, Zhou Z, Zhang S, et al. Multicenter cohort study demonstrates more consolidation in upper lungs on initial CT increases the risk of adverse clinical outcome in COVID-19 patients. *Theranostics*. 2020; 10:5641–8. <https://doi.org/10.7150/thno.46465> PMID: 32373237
  17. Liu F, Zhang Q, Huang C, Shi C, Wang L, Shi N, et al. CT quantification of pneumonia lesions in early days predicts progression to severe illness in a cohort of COVID-19 patients. *Theranostics*. 2020; 10:5613–22. <https://doi.org/10.7150/thno.45985> PMID: 32373235
  18. Meng H, Xiong R, He R, Lin W, Hao B, Zhang L, et al. CT imaging and clinical course of asymptomatic cases with COVID-19 pneumonia at admission in Wuhan, China. *J Infect*. 2020; 81:e33–e39. <https://doi.org/10.1016/j.jinf.2020.04.004> PMID: 32294504
  19. Li L, Yang L, Gui S, Pan F, Ye T, Liang B, et al. Association of clinical and radiographic findings with the outcomes of 93 patients with COVID-19 in Wuhan, China. *Theranostics*. 2020; 10:6113–21. <https://doi.org/10.7150/thno.46569> PMID: 32483442
  20. Mahdjoub E, Mohammad W, Lefevre T, Debray M-P, Khalil A. Admission chest CT score predicts 5-day outcome in patients with COVID-19. *Intensive Care Med* 2020. <https://doi.org/10.1007/s00134-020-06118-y> PMID: 32468085
  21. Kaminetzky M, Moore W, Fansiwala K, Babb JS, Kaminetzky D, Horwitz LI, et al. Pulmonary Embolism on CTPA in COVID-19 Patients. *Radiology: Cardiothoracic Imaging*. 2020; 2:e200308. <https://doi.org/10.1148/ryct.2020200308>
  22. Oudkerk M, Büller HR, Kuijpers D, van Es N, Oudkerk SF, McLoud TC, et al. Diagnosis, Prevention, and Treatment of Thromboembolic Complications in COVID-19: Report of the National Institute for Public Health of the Netherlands. *Radiology*. 2020;201629. <https://doi.org/10.1148/radiol.2020201629> PMID: 32324101
  23. Cavagna E, Muratore F, Ferrari F. Pulmonary Thromboembolism in COVID-19: Venous Thromboembolism or Arterial Thrombosis? *Radiology: Cardiothoracic Imaging*. 2020; 2:e200289. <https://doi.org/10.1148/ryct.2020200289>
  24. Ackermann M, Verleden SE, Kuehnel M, Haverich A, Welte T, Laenger F, et al. Pulmonary Vascular Endothelialitis, Thrombosis, and Angiogenesis in Covid-19. *N Engl J Med* 2020. <https://doi.org/10.1056/NEJMoa2015432> PMID: 32437596
  25. Ye Z, Zhang Y, Wang Y, Huang Z, Song B. Chest CT manifestations of new coronavirus disease 2019 (COVID-19): a pictorial review. *Eur Radiol* 2020. <https://doi.org/10.1007/s00330-020-06801-0> PMID: 32193638
  26. Goyal N, Chung M, Bernheim A, Keir G, Mei X, Huang M, et al. Computed Tomography Features of Coronavirus Disease 2019 (COVID-19): A Review for Radiologists. *J Thorac Imaging*. 2020; 35:211–8. <https://doi.org/10.1097/RTI.0000000000000527> PMID: 32427651
  27. Li K, Wu J, Wu F, Guo D, Chen L, Fang Z, et al. The Clinical and Chest CT Features Associated With Severe and Critical COVID-19 Pneumonia. *Invest Radiol*. 2020; 55:327–31. <https://doi.org/10.1097/RLI.0000000000000672> PMID: 32118615
